# Supplementary material for: Parallel Evolution of Leukemic Clones in Myeloproliferative Neoplasms
Source: Research Square preprint supplement (doi:10.21203/rs.3.rs-8097141/v1), 2025-11-17
Supplement: Supplementary file 1 [file c8f8e017d6441cc8a8f6820c.pdf]

- 1
- 2
- 3
- 4
- 5
- 6
- 7
- 8
- 9
- 0
- 1
- 2
- 3
- 4
- 5
- 6
- 7
- 8
- 9
- 20
- 21
- 22
- 23

2  
3  
4

67

80

## 12

45

## 78

9



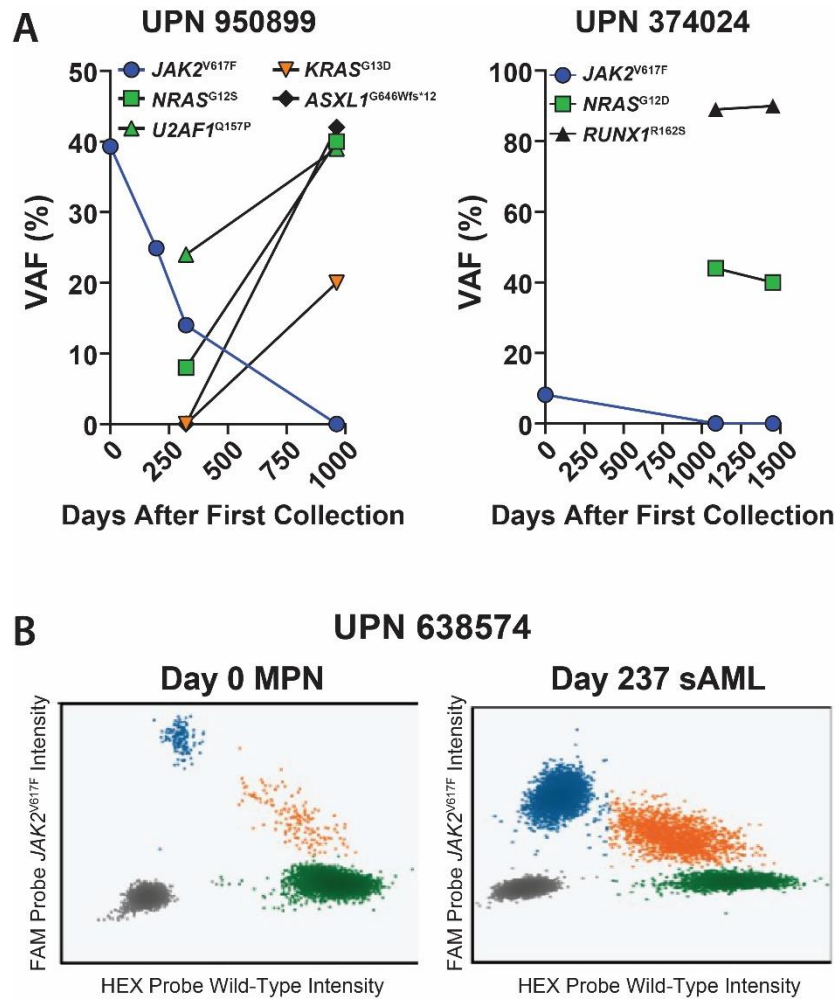

**Figure S1.**

**(A)** Variant allele frequencies (VAF) of mutations identified from clinical sequencing for indicated patients. **(B)** ddPCR quantification of  $JAK2^{V617F}$  mutant burden at MPN and sAML collection timepoints for UPN:638574.

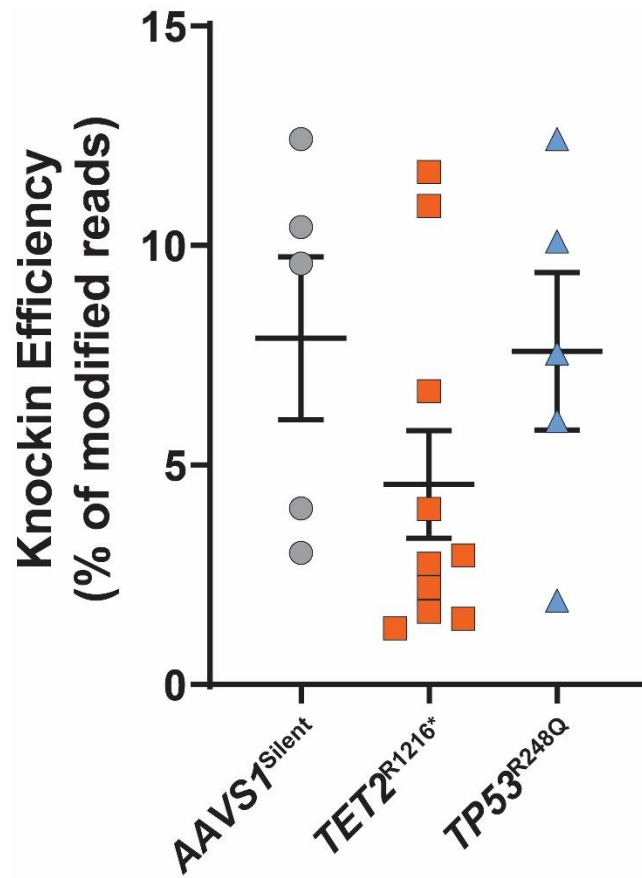

**Figure S2.**

Starting CRISPR/Cas9 knock-in efficiencies of indicated mutations in cord blood CD34<sup>+</sup> cells determined by next-generation sequencing.

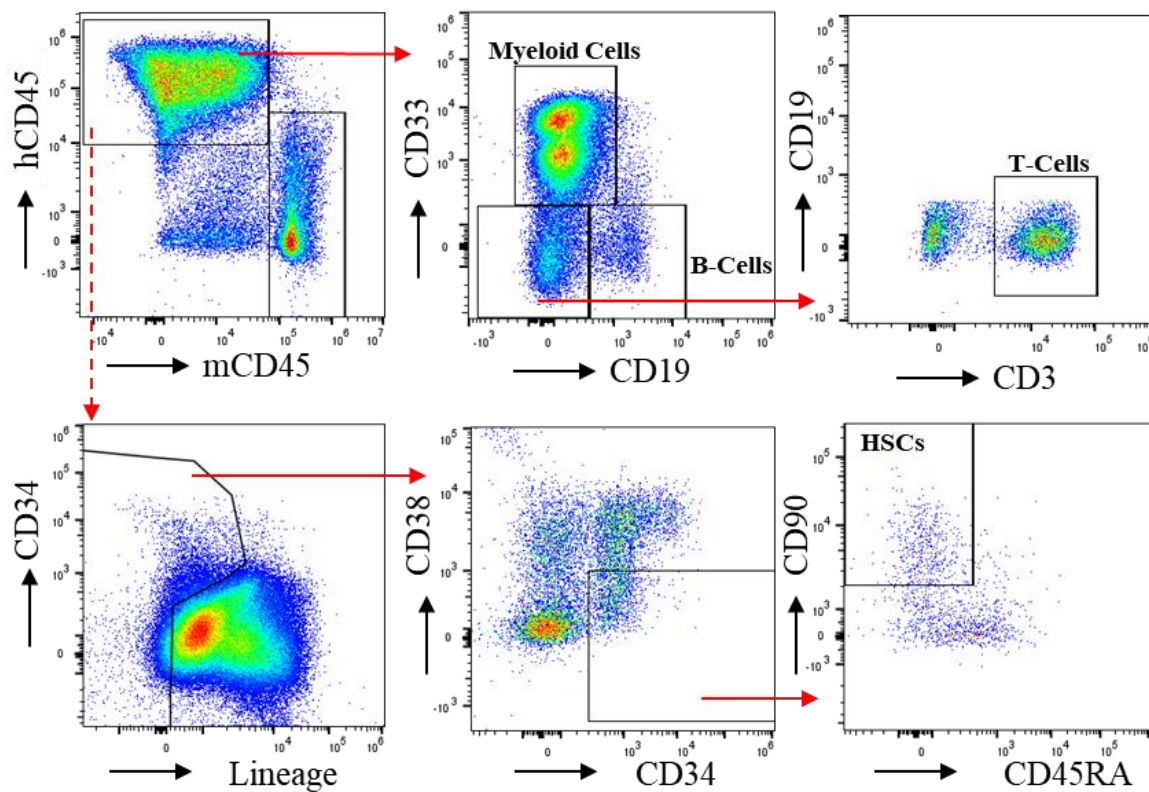

**Figure S3.** Representative flow cytometry gating scheme of live singlets to identify human cell engraftment, blood cell lineage and HSC populations in PDX experiments.

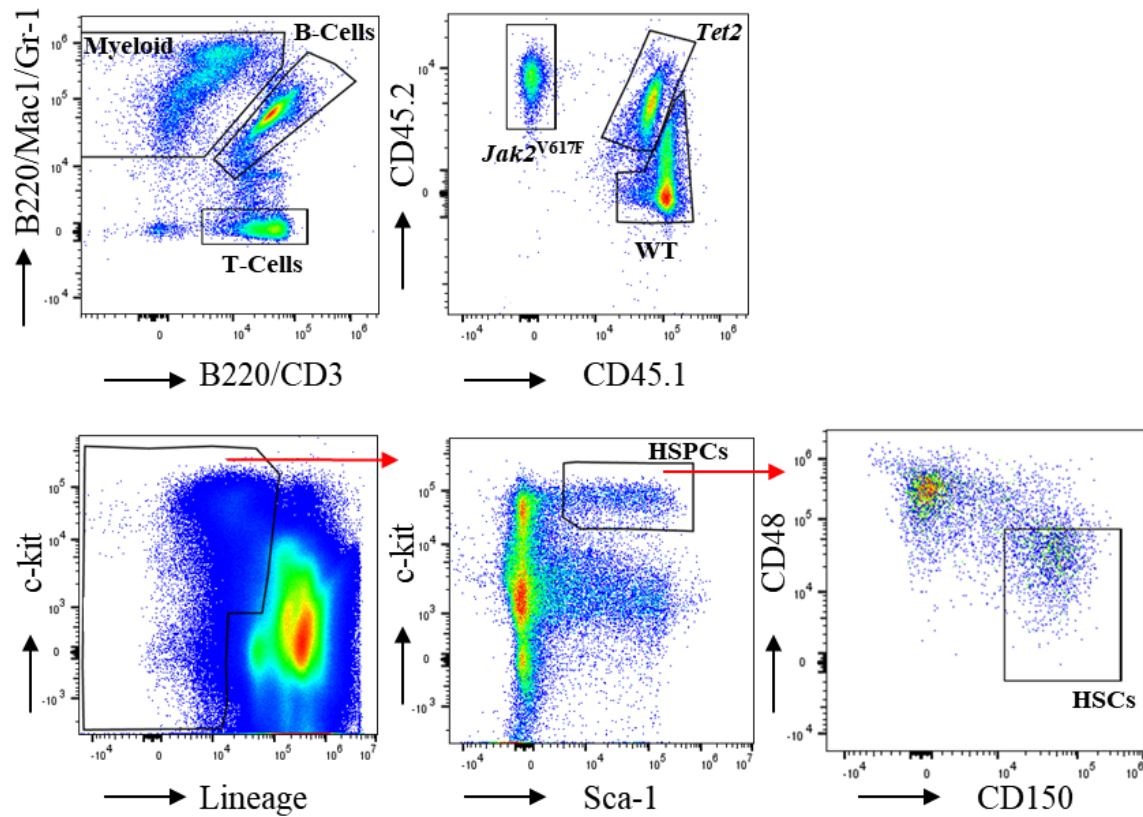

**Figure S4.**

Representative flow cytometry gating scheme of live singlets to identify (top row) mouse peripheral blood cell lineage distribution and donor-derived chimerism and (bottom row) discrimination of mouse HSPC and HSC populations in BM of recipient mice.

80

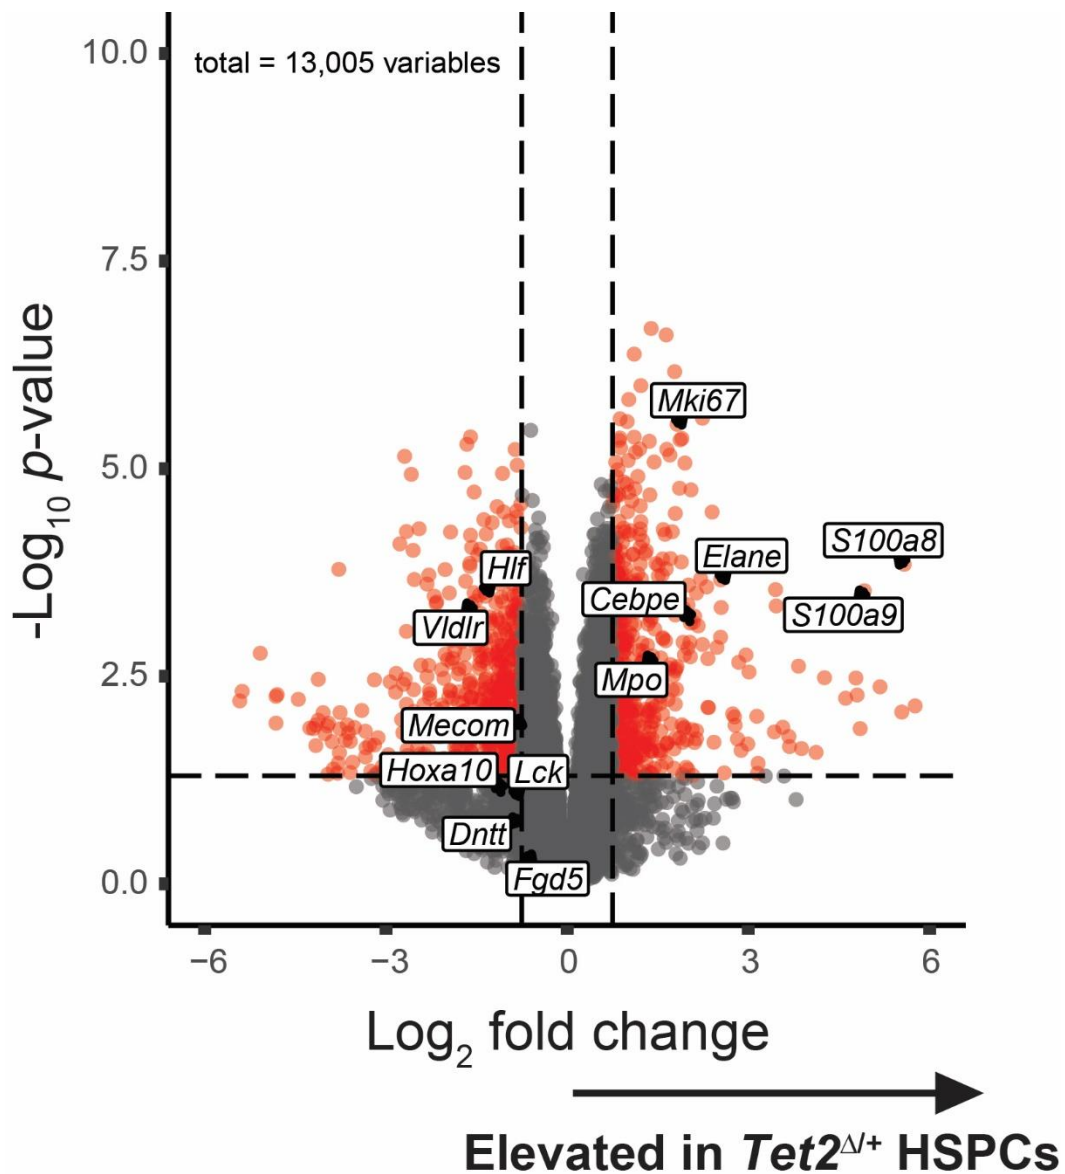

81

82

### 83 **Figure S5.**

84 Volcano plot depicting differentially expressed genes between *Tet2*<sup>Δ/+</sup> HSPCs from a *Jak2*<sup>V617F</sup>  
 85 environment compared to WT HSPCs from a *Jak2*<sup>V617F</sup> environment.

86

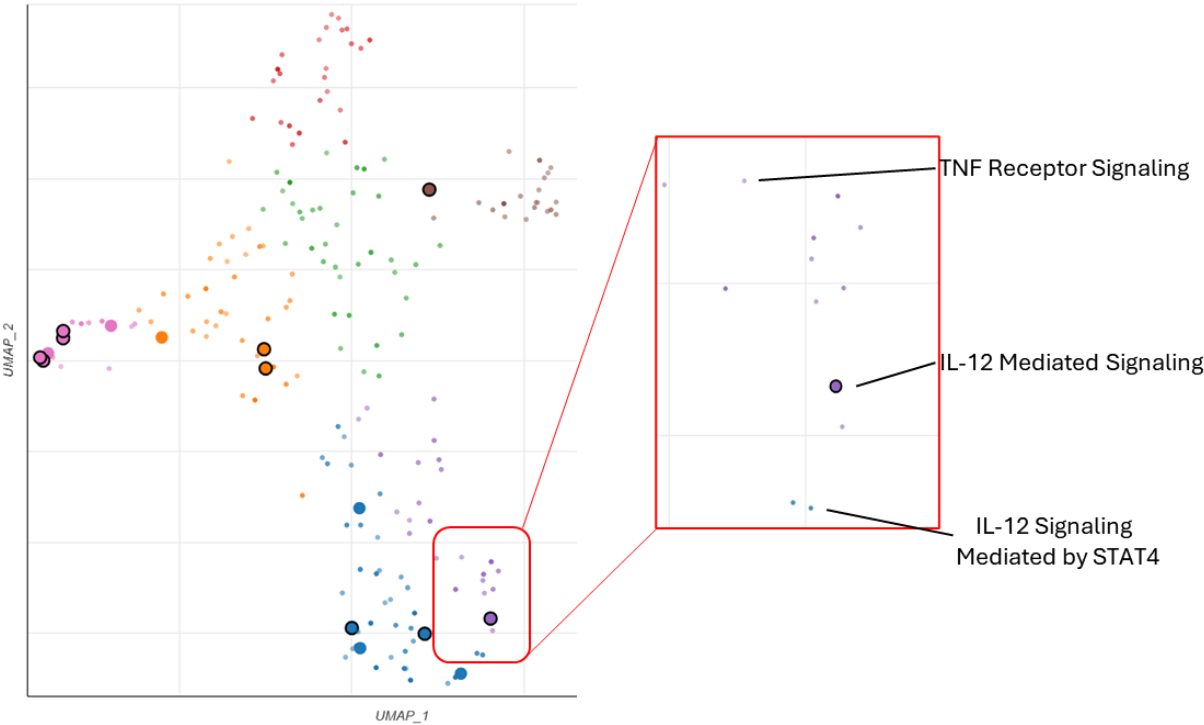

90 **Figure S6.**

91 UMAP visualization of relationships between enriched cancer-related pathways determined by  
92 input list of differentially expressed genes between *Tet2*<sup>Δ/+</sup> HSPCs cells from a *Jak2*<sup>V617F</sup>  
93 environment compared to WT HSPCs form a *Jak2*<sup>V617F</sup> environment. Terms with more similar  
94 gene sets are positioned closer together. The darker and larger the point, the more significantly  
95 enriched the term.  
96  
97



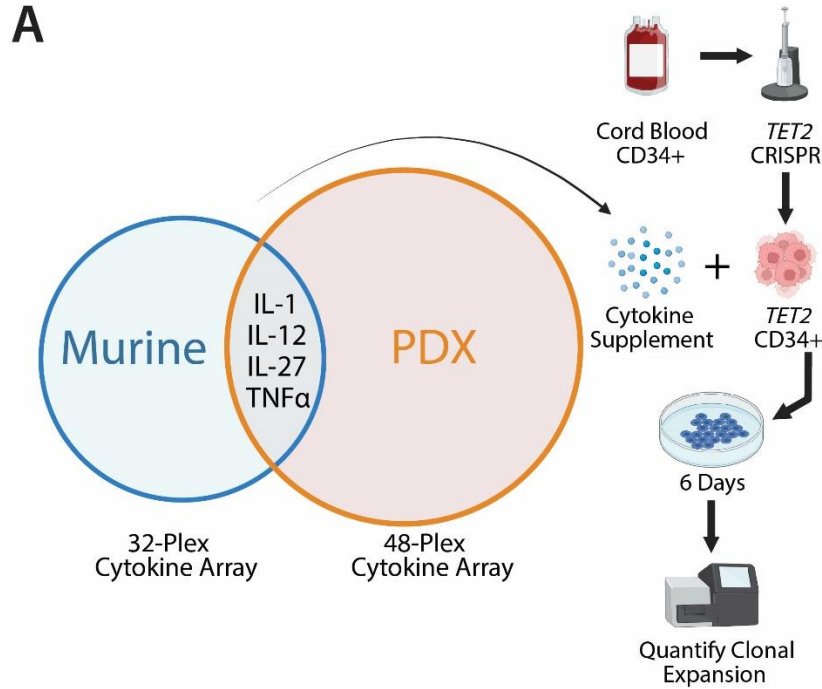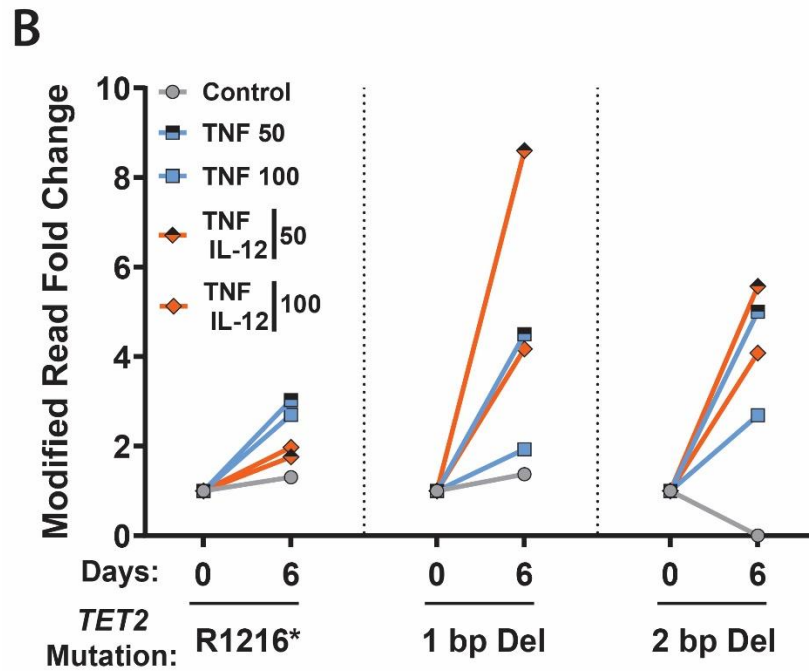

**Figure S7.**

**(A)** Schematic illustrating workflow for testing cytokines identified to correlate with *TET2*-mutant clone expansion from *in vivo* studies. **(B)** VAF quantification of tracked CRISPR-engineered *TET2* mutations in CB-derived CD34+ cells in media supplemented with indicated cytokines.

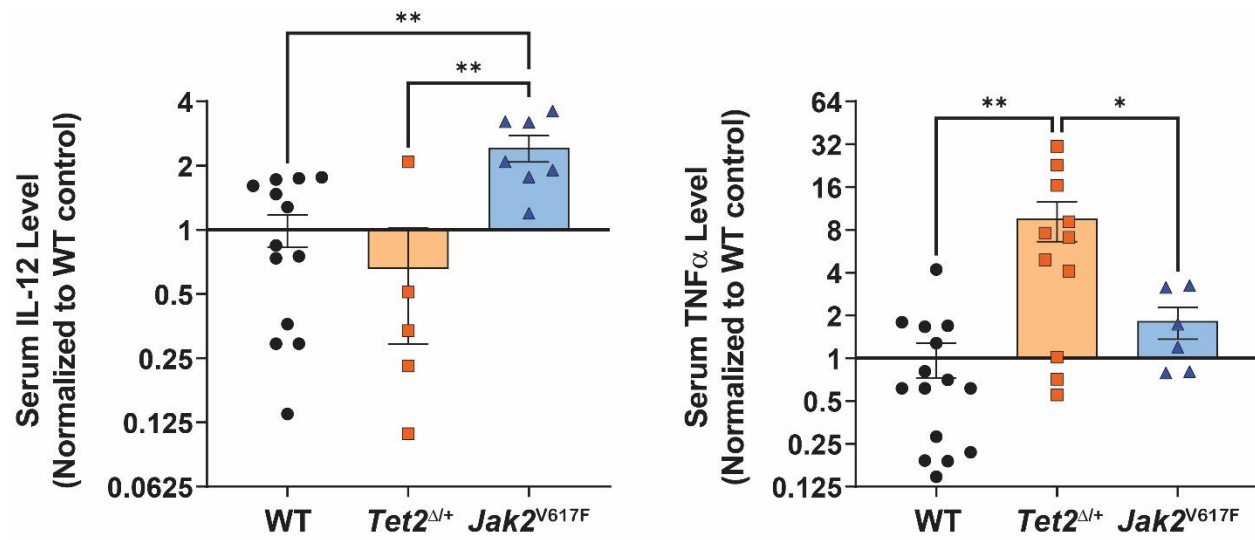

**Figure S8.**

Serum cytokine levels of IL-12 and TNF $\alpha$  from donor WT, *Tet2*<sup>Δ/+</sup> and *Jak2*<sup>V617F</sup> mice normalized to average levels of WT mice.

| Figure  | UPN    | Age | Sex | Dx   | <i>JAK2</i> <sup>V617F</sup> VAF | Other Variants           | Treatments                                 |
|---------|--------|-----|-----|------|----------------------------------|--------------------------|--------------------------------------------|
| 1       | 950899 | 73  | M   | MF   | 25%                              | None Reported            | Ruxolitinib + Aspirin                      |
| 1       | 950899 | 75  | M   | sAML | ND                               | U2AF1, NRAS, KRAS        | Transfusion                                |
| 1       | 374024 | 75  | M   | PV   | 8%                               | None Reported            | Aspirin                                    |
| 1       | 374024 | 79  | M   | sAML | ND                               | NRAS                     | Aranesp                                    |
| 1       | 638574 | 59  | M   | MF   | Positive                         | None Reported            | N/A                                        |
| 1       | 638574 | 60  | M   | sAML | ND                               | RUNX1, PHF6              | N/A                                        |
| 1       | 101811 | 78  | F   | PV   | 40%                              | DNMT3A, PPM1D            | Hydrea + Aspirin + Intermittent phlebotomy |
| 1       | 867898 | 64  | F   | MF   | 40%                              | None Reported            |                                            |
| 2 / 4   | 117987 | 38  | M   | PV   | 5%                               | None Reported            | Aspirin + Intermittent phlebotomy          |
| 2 / 4   | 867898 | 64  | F   | MF   | 40%                              | None Reported            | Momelotinib + Aspirin                      |
| 2, 4, 5 | 702759 | 26  | F   | PV   | 2%                               | None Reported            | Aspirin                                    |
| 2 / 4   | 172431 | 76  | F   | MF   | 86%                              | BCOR                     | Ruxolitinib + Retacrit                     |
| 2 / 4   | 899567 | 58  | F   | PV   | 88%                              | None Reported            | Hydrea + Aspirin + Intermittent phlebotomy |
| 2 / 4   | 497757 | 55  | F   | MF   | 47%                              | None Reported            | Ruxolitinib + Aspirin                      |
| 2 / 4   | 603873 | 49  | M   | PV   | 5%                               | None Reported            | Aspirin + Intermittent phlebotomy          |
| 2 / 4   | 523915 | 73  | M   | MF   | 10%                              | ASXL1, CBL, EZH2, SETBP1 | Ruxolitinib                                |

**Table S1.**

Clinical characteristics from patient samples used throughout the study. All MPN samples contained a *JAK2*<sup>V617F</sup> driver mutation.

N/A = data not available.

|               |              |              |               |              |
|---------------|--------------|--------------|---------------|--------------|
| <i>ASXL1</i>  | <i>ERG</i>   | <i>KDM6A</i> | <i>NRAS</i>   | <i>SMC1A</i> |
| <i>ATM</i>    | <i>ETV6</i>  | <i>KIT</i>   | <i>PHF6</i>   | <i>SMC3</i>  |
| <i>BCOR</i>   | <i>EZH2</i>  | <i>KMT2A</i> | <i>PPM1D</i>  | <i>STAG2</i> |
| <i>BRAF</i>   | <i>FLT3</i>  | <i>KRAS</i>  | <i>PTEN</i>   | <i>STAT3</i> |
| <i>CALR</i>   | <i>GATA2</i> | <i>MPL</i>   | <i>PTPN11</i> | <i>TET2</i>  |
| <i>CBL</i>    | <i>GNAS</i>  | <i>MYC</i>   | <i>RAD21</i>  | <i>TP53</i>  |
| <i>CHEK2</i>  | <i>IDH1</i>  | <i>MYD88</i> | <i>RUNX1</i>  | <i>U2AF1</i> |
| <i>CSF3R</i>  | <i>IDH2</i>  | <i>NF1</i>   | <i>SETBP1</i> | <i>WT1</i>   |
| <i>DNMT3A</i> | <i>JAK2</i>  | <i>NPM1</i>  | <i>SF3B1</i>  | <i>ZRSR2</i> |

**Table S2.**

MissionBio Tapestri Myeloid Panel targeting 45 genes with 312 amplicons over approximately 65kb of target space.

**Data S1. (separate file)**

Gene expression analysis of 1) *Tet2*<sup>Δ/+</sup> HSPCs isolated from a *Jak2*<sup>V617F</sup> background vs. *Tet2*<sup>Δ/+</sup> HSPCs isolated from a WT background, 2) *Tet2*<sup>Δ/+</sup> HSPCs isolated from a *Jak2*<sup>V617F</sup> background vs. WT HSPCs isolated from a *Jak2*<sup>V617F</sup> background, and 3) WT HSPCs isolated from a *Jak2*<sup>V617F</sup> background vs. WT HSPCs isolated from a WT background.
